# Supplementary material for: Fe5C2 nanoparticles: a reusable bactericidal material with photothermal effects under near-infrared irradiation
Source: Royal Society of Chemistry journal article supplement (doi:10.1039/c5tb00201j), 2015-01-01
Supplement: c5tb00201j1.pdf [file c5tb00201j1.pdf]

**Electronic Supplementary Information**

**Fe<sub>5</sub>C<sub>2</sub> nanoparticles: a reusable bactericidal material with  
photothermal effect under near-infrared irradiation**

**Yinjia Jin<sup>a, b</sup>, Jun Deng<sup>a</sup>, Jing Yu<sup>c</sup>, Ce Yang<sup>c</sup>,**

**Meiping Tong<sup>\*a</sup>, Yanglong Hou<sup>\*c</sup>**

**<sup>a</sup>The Key Laboratory of Water and Sediment Sciences, Ministry of Education;  
College of Environmental Sciences and Engineering, Peking University, Beijing,  
100871, P. R. China**

**<sup>b</sup>Currently at Huadian Electric Power Research Institute, Hangzhou, 310030,  
China**

**<sup>c</sup>Department of Advanced Materials and Nanotechnology,  
College of Engineering, Peking University, Beijing, 100871, P. R. China**

**NUMBER OF PAGES: 8**

**NUMBER OF FIGURES: 6**

**Figure S1. XRD spectra of Fe<sub>5</sub>C<sub>2</sub> nanoparticles.**

\* Corresponding authors: Tel: +8610 62756491; Fax: +86 10 62756526; Tel: +86 10 62753115; Fax: +86 10 62753115, E-mail addresses: [tongmeiping@pku.edu.cn](mailto:tongmeiping@pku.edu.cn),  
[hou@pku.edu.cn](mailto:hou@pku.edu.cn).

- 1 **Figure S2.** XPS spectra of Fe<sub>5</sub>C<sub>2</sub> nanoparticles.
- 2 **Figure S3.** XPS spectra of Fe 2p (a) and C 1s (b) of Fe<sub>5</sub>C<sub>2</sub> nanoparticles.
- 3 **Figure S4.** Raman spectra of Fe<sub>5</sub>C<sub>2</sub> nanoparticles.
- 4 **Figure S5.** Magnetism curve (a) and magnetic separation photo (b) of Fe<sub>5</sub>C<sub>2</sub>
- 5 nanoparticles.
- 6 **Figure S6.** Temperature variations of Fe<sub>5</sub>C<sub>2</sub> nanoparticles suspension in the presence
- 7 of 10 mg/L of HA under the NIR irradiation. Error bars represent standard deviations
- 8 from triplicate experiments (n=3).
- 9

1

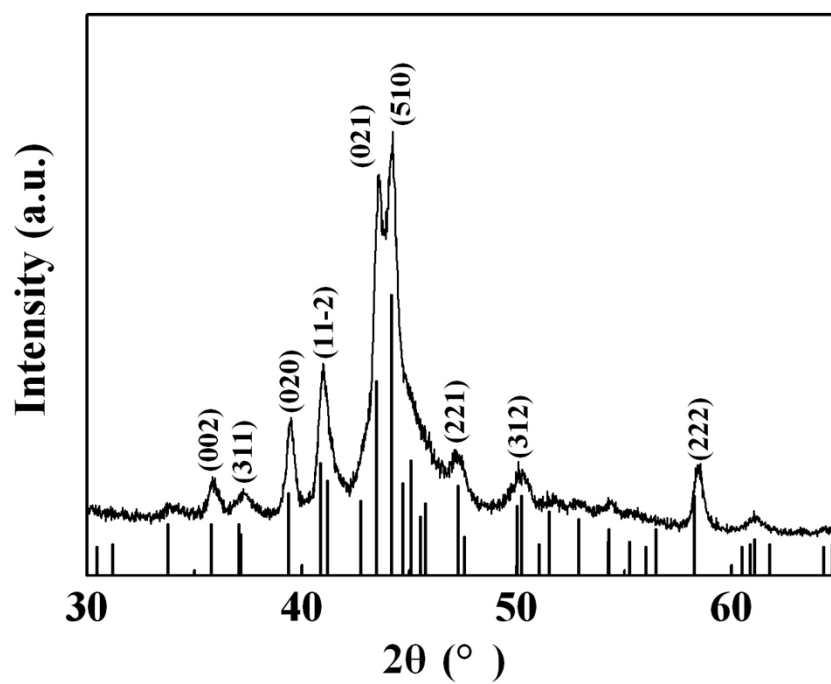

2

3

4 **Figure S1.** XRD spectra of Fe<sub>5</sub>C<sub>2</sub> nanoparticles.

1

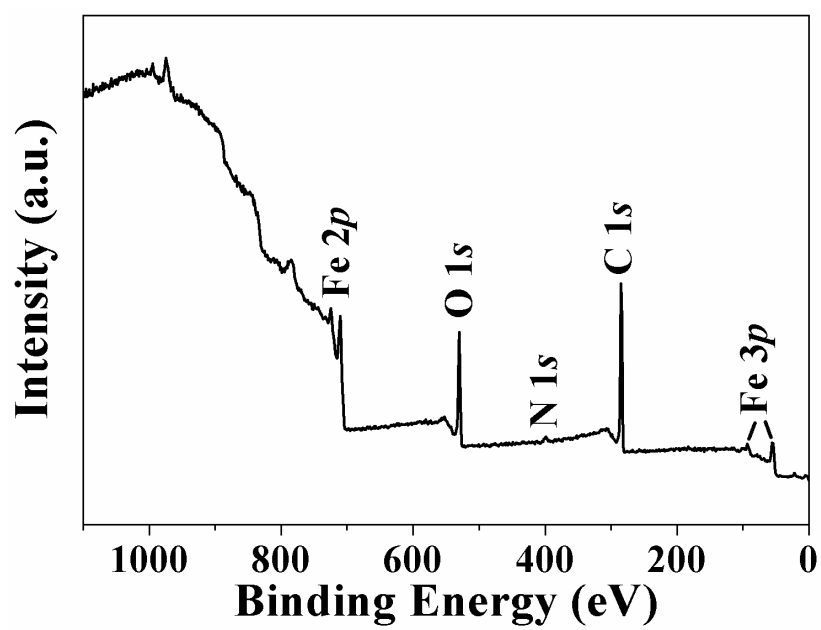

2

3

4 **Figure S2.** XPS spectra of Fe<sub>5</sub>C<sub>2</sub> nanoparticles.

1

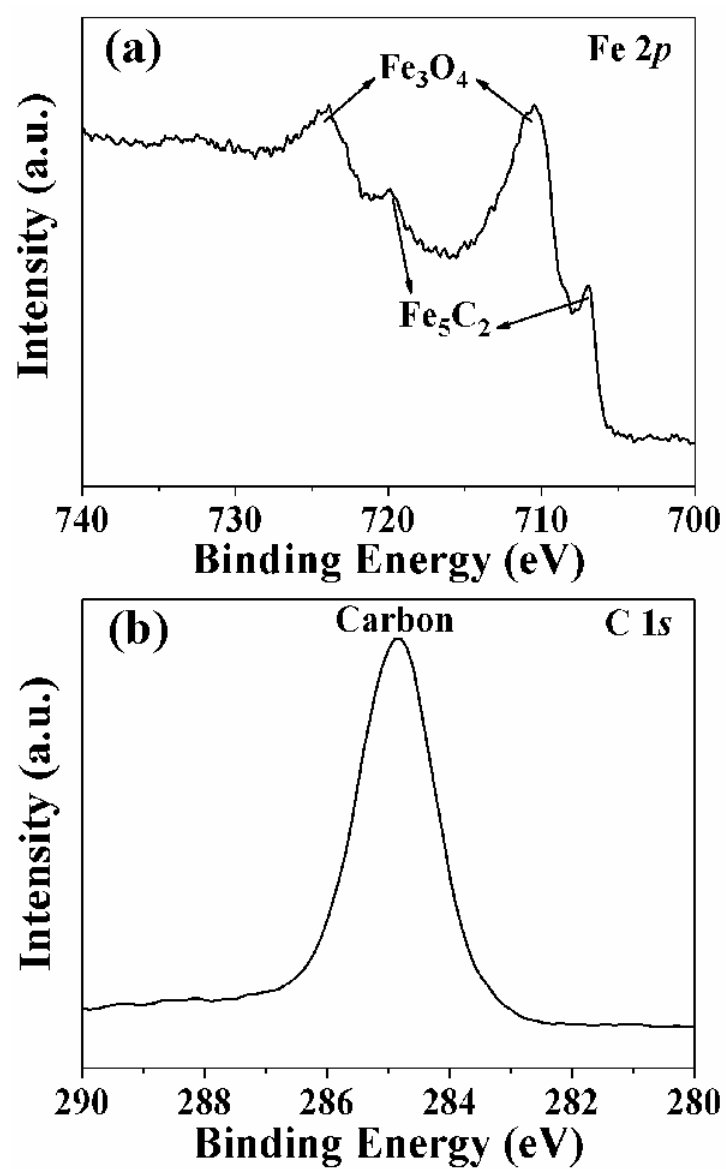

2

3

4 **Figure S3.** XPS spectra of Fe 2p (a) and C 1s (b) of  $\text{Fe}_5\text{C}_2$  nanoparticles.

1

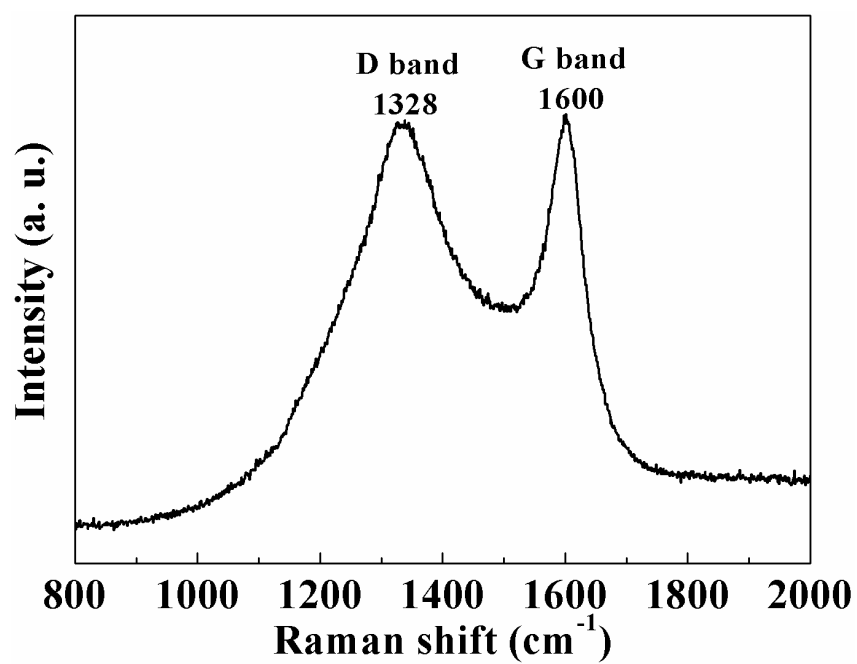

2

3

4 **Figure S4.** Raman spectra of Fe<sub>5</sub>C<sub>2</sub> nanoparticles.

1

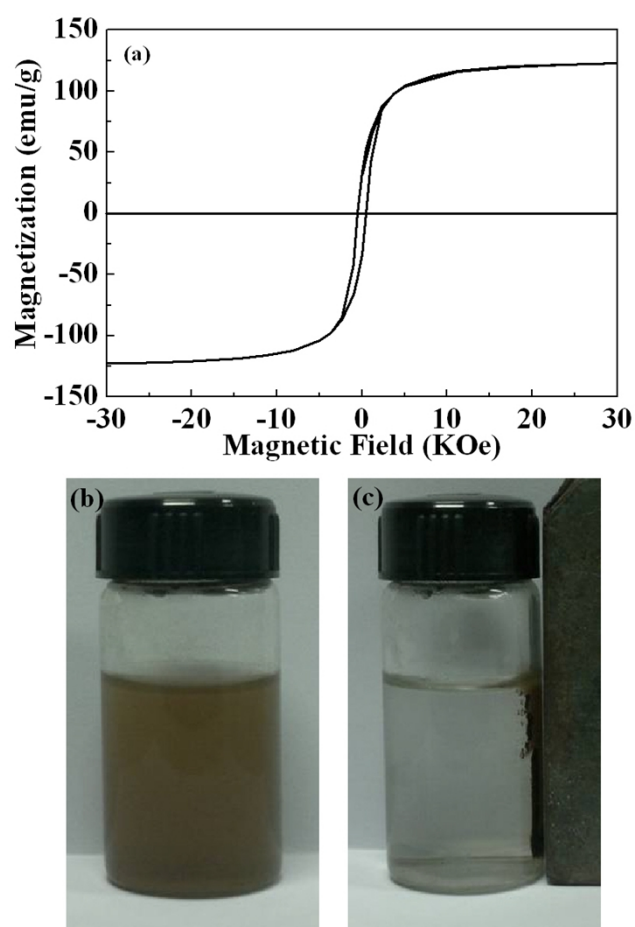

2

3

4 **Figure S5.** Magnetism curve (a) and magnetic separation photo (b) of  $\text{Fe}_5\text{C}_2$

5 nanoparticles.

6

7

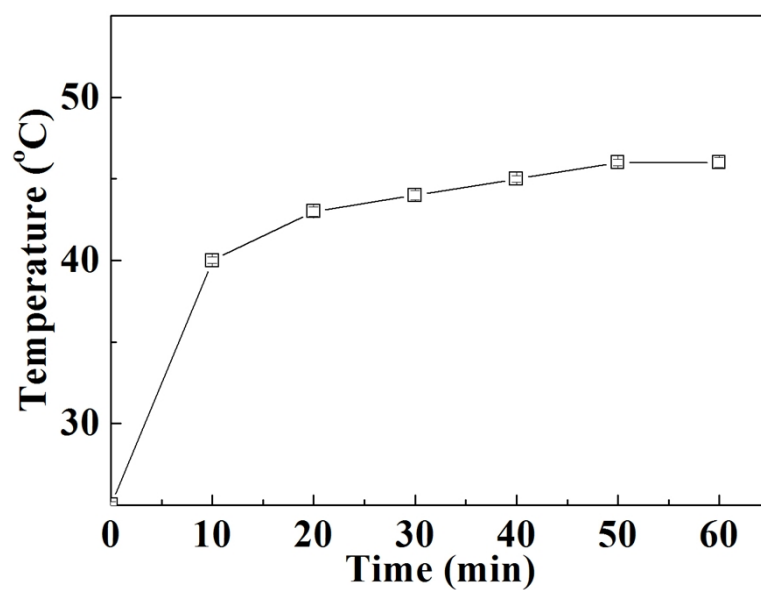

1  
2

3 **Figure S6.** Temperature variations of  $\text{Fe}_5\text{C}_2$  nanoparticles suspension in the presence  
4 of 10 mg/L of HA under the NIR irradiation. Error bars represent standard deviations  
5 from triplicate experiments (n=3).
